# Supplementary material for: Can an entirely negative fluorine in a molecule, viz. perfluorobenzene, interact attractively with the entirely negative site(s) on another molecule(s)? Like liking like!
Source: Royal Society of Chemistry journal article supplement (doi:10.1039/c5ra27039a), 2016-01-01

# Can an entirely negative fluorine in a molecule, viz. perfluorobenzene, interact attractively with the entirely negative site(s) on another molecule(s)? Like liking like!

Arpita Varadwaj,<sup>a</sup> Pradeep R. Varadwaj,<sup>1,b</sup> Bih-Yaw Jin<sup>a</sup>

<sup>a</sup> Department of Chemistry, National Taiwan University, Taipei, 10617, Taiwan

<sup>b</sup> Department of Chemical System Engineering, School of Engineering, The University of Tokyo 7-3-1, Hongo, Bunkyo-ku, Japan 113-8656

## Supplementary Information

Fig. S1: RDG vs.  $\text{Sign}(\lambda_2)\times\rho$  (left) and RDG = 0.6 a.u. isosurface (right) NCI graphical plots for  $\text{H}_3\text{N}\cdots\text{FC}_6\text{F}_5$ . The spikes in the  $\lambda_2 < 0$  and  $\lambda_2 > 0$  regions represent to the bonded (attractive) and non-bonded (repulsive) interactions, respectively. The respective  $s = 0.6$  a.u. RDG isosurfaces painted in green and red are depicted in Fig. 2 (see the ball and stick models). (Also, see Fig. 1 for conformational details, and that the dimer labeling in Fig. 1 is in consistent with that shown in Fig. 2 for QTAIM and RDG based molecular and RDG plots, respectively).

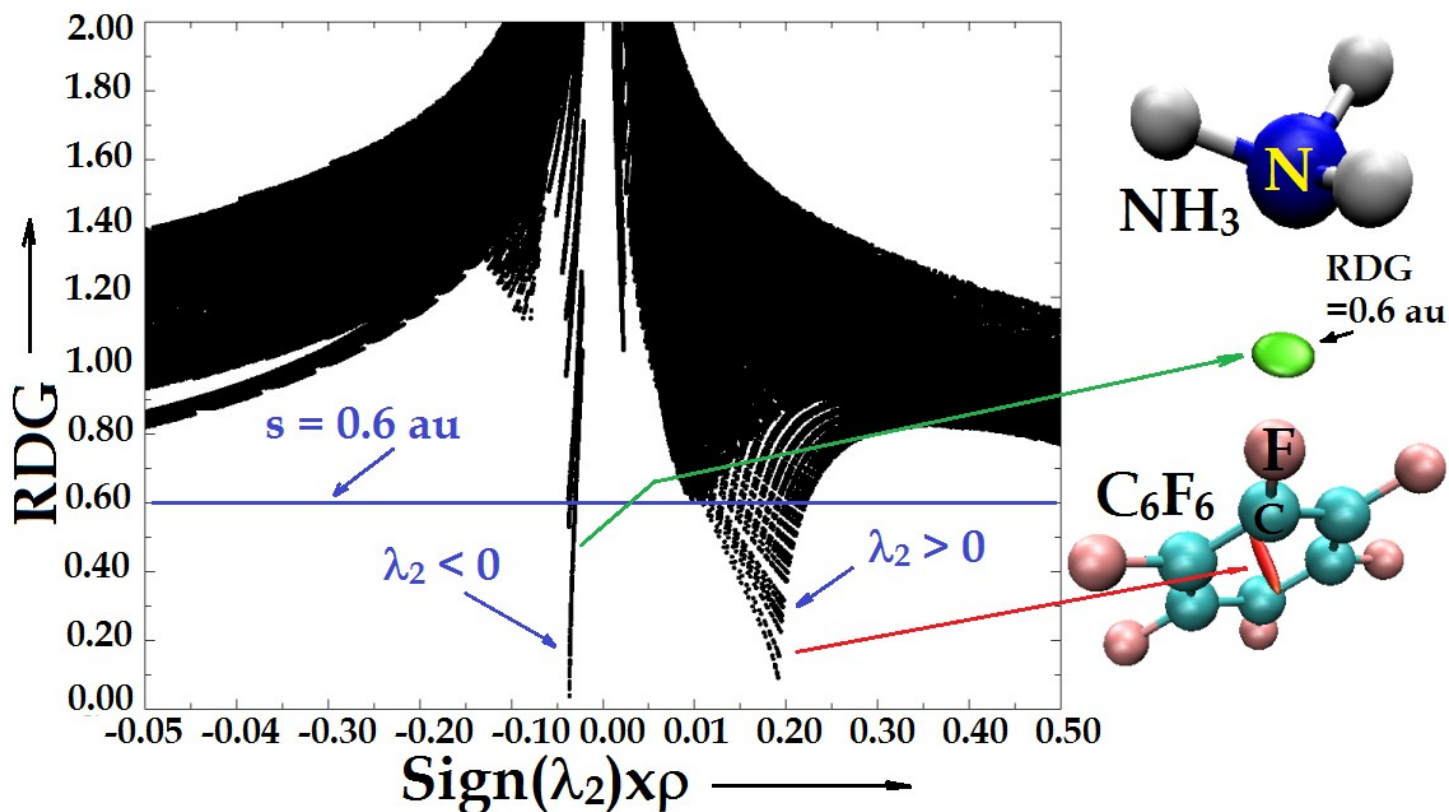

<sup>1</sup> Corresponding Author's Email Addresses: pradeep@t.okayama-u.ac.jp, pradeep@tcl.t.u-tokyo.ac.jp

Fig. S2: RDG vs.  $\text{Sign}(\lambda_2)\times\rho$  plot for  $\text{H}_2\text{O}\cdots\text{FC}_6\text{F}_5$  a),  $\text{H}_2\text{O}\cdots\text{FC}_6\text{F}_5$  b),  $\text{H}_3\text{CF}\cdots\text{FC}_6\text{F}_5$  c),  $\text{H}_3\text{CF}\cdots\text{FC}_6\text{F}_5$  d),  $\text{HF}\cdots\text{FC}_6\text{F}_5$  e) and  $\text{HF}\cdots\text{FC}_6\text{F}_5$  f) (values in a.u.). The spikes in the  $\lambda_2 < 0$  and  $\lambda_2 > 0$  regions represent to the bonded (attractive) and non-bonded (repulsive) interactions, respectively. The respective  $s = 0.6$  a.u. RDG isosurfaces painted in green and red are depicted in Fig. 2 (see the ball and stick models). (Also, see Fig. 1 for conformational details, and that the dimer labeling in Fig. 1 is in consistent with that shown in Fig. 2 for QTAIM and RDG based molecular and RDG plots, respectively).

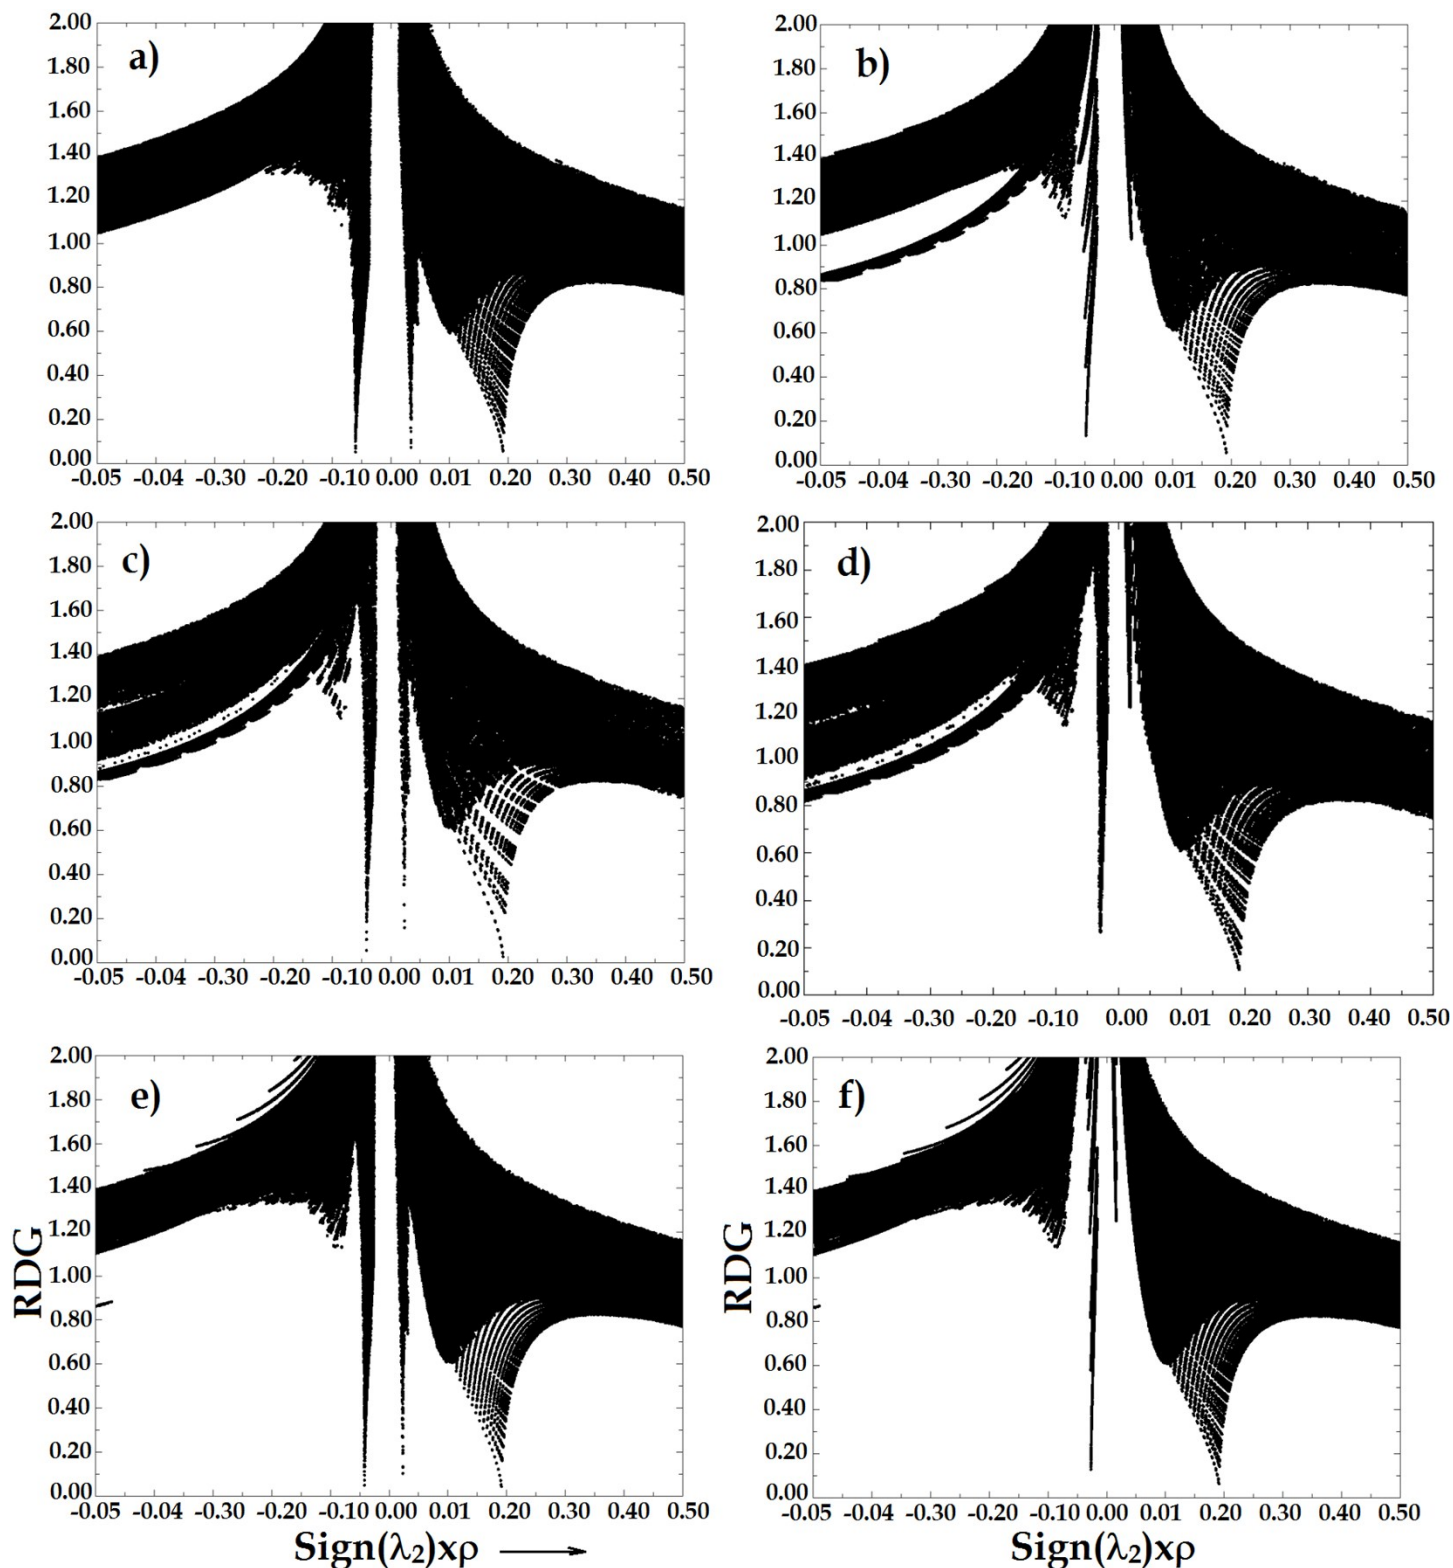

Fig. S3: RDG vs.  $\text{Sign}(\lambda_2) \times \rho$  plot for  $\text{H}_2\text{CO} \cdots \text{FC}_6\text{F}_5$  (h),  $\text{H}_2\text{CO} \cdots \text{FC}_6\text{F}_5$  (i),  $\text{C}_5\text{F}_5\text{N} \cdots \text{FC}_6\text{F}_5$  (j),  $\text{C}_4\text{F}_4\text{N}_2 \cdots \text{FC}_6\text{F}_5$  (k),  $\text{C}_4\text{F}_4\text{N}_2 \cdots \text{FC}_6\text{F}_5$  (l), and  $(\text{CF})_4\text{N}_2 \cdots \text{FC}_6\text{F}_5$  (m) (values in a.u.). The spikes in the  $\lambda_2 < 0$  and  $\lambda_2 > 0$  regions represent to the bonded (attractive) and non-bonded (repulsive) interactions, respectively. The respective  $s = 0.6$  a.u. RDG isosurfaces painted in green and red are depicted in Fig. 2 (see the ball and stick models). (Also, see Fig. 1 for conformational details, and that the dimer labeling in Fig. 1 is in consistent with that shown in Fig. 2 for QTAIM and RDG based molecular and RDG plots, respectively).

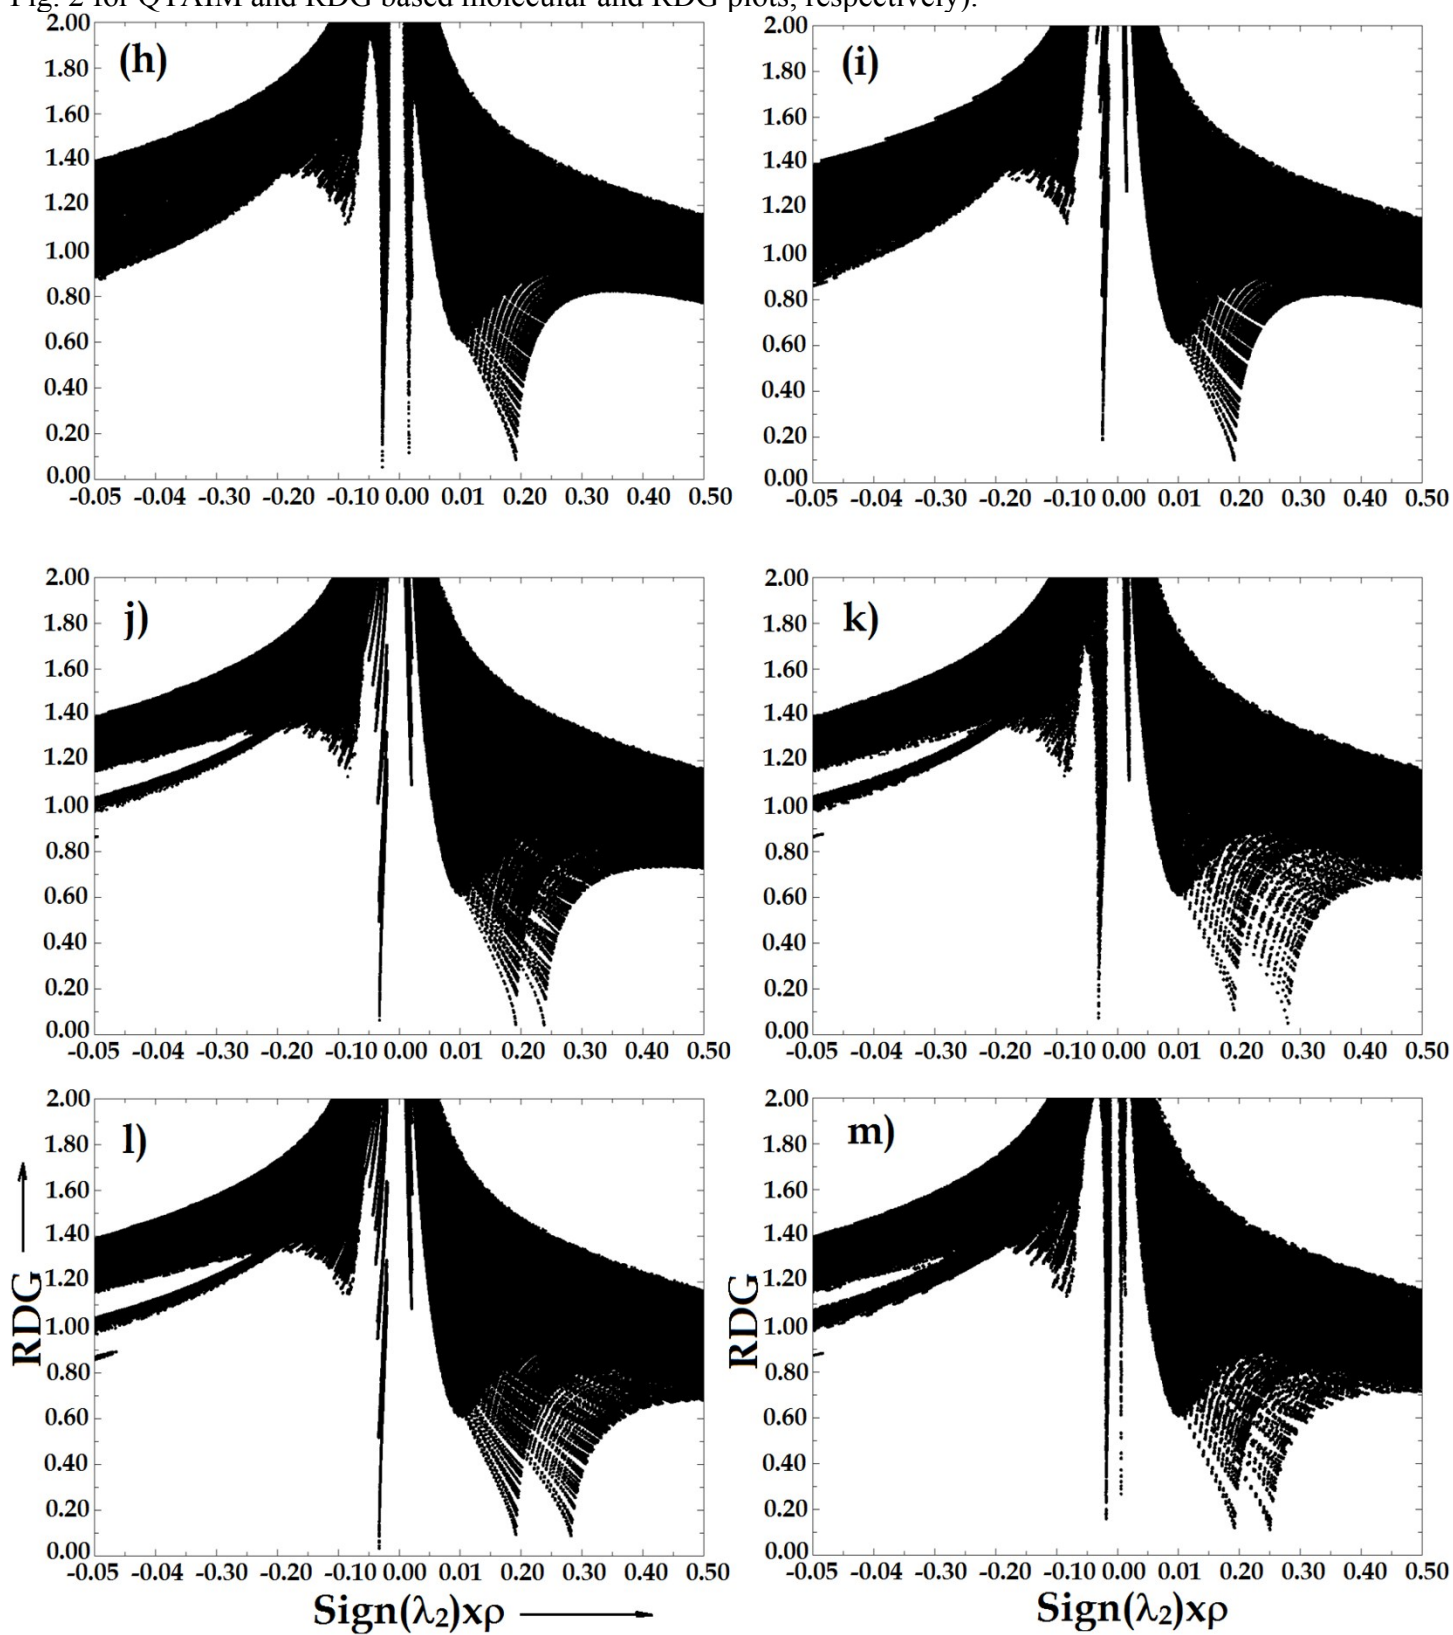

Supplement: c5ra27039a1.pdf [file c5ra27039a1.pdf]
